# Rigid geometry solves “curse of dimensionality” effects in clustering methods: An application to omics data

Shun Adachi<sup>#\*</sup>

Center for Anatomical, Pathological and Forensic Medical Researches, Graduate School of Medicine, Kyoto University, Konoe-cho, Yoshida, Sakyo-ku, Kyoto, Kyoto 606-8501 Japan

<sup>#</sup>Current Address: 146-2-4-205 Nakagawara, Makishima-cho, Uji, Kyoto 611-0041 Japan

\*[f.peregrinusns@mbox.kyoto-inet.or.jp](mailto:f.peregrinusns@mbox.kyoto-inet.or.jp)

## Abstract

The quality of samples preserved long term at ultralow temperatures has not been adequately studied. To improve our understanding, we need a strategy to analyze protein degradation and metabolism at subfreezing temperatures. To do this, we obtained liquid chromatography-mass spectrometry (LC/MS) data of calculated protein signal intensities in HEK-293 cells. Our first attempt at directly clustering the values failed, most likely due to the so-called “curse of dimensionality”. The clusters were not reproducible, and the outputs differed with different methods. By utilizing rigid geometry with a prime ideal  $I$ -adic ( $p$ -adic) metric, however, we rearranged the sample clusters into a meaningful and reproducible order, and the results were the same with each of the different clustering methods tested. Furthermore, we have also succeeded in application of this method to expression array data in similar situations. Thus, we eliminated the “curse of dimensionality” from the data set, at least in clustering methods. It is possible that our approach determines a characteristic value of systems that follow a Boltzmann distribution.

Short Title: Rigid geometry solves “curse of dimensionality”

# Introduction

Even when frozen, biological samples degrade during aging, and most frozen cell cultures are stored for only two years. However, the cause of degradation is not well understood. A few reports have described enzymatic activities in frozen cultures, including lipase and peroxidase activities (see, e.g., [1, 2]). However, the proteomic details of cells stored at subfreezing temperatures are not known. One study used liquid chromatography-mass spectrometry (LC/MS) to study frogs in a simulated winter environment [3]; it lacks solid statistical analysis and did not consider subfreezing temperatures. In order to evaluate the potential degradation/metabolism, it is important to obtain solid proteomic data from actual frozen cultures under long-term storage in a subfreezing environment.

To do this, we devised a procedure that can distinguish samples from long-term storage from those that have been freshly prepared. Clustering analysis is a popular approach to such an evaluation; this approach uses criteria for similarity/dissimilarity to divide the data into meaningful groups. It is based on a bottom-up calculation of the data, and thus the criteria are part of the system. However, it is still necessary to define the groups and to select the actual clustering methods. If different clustering methods yield the same topological structure of the hierarchical tree or the same indices of the clusters, it can be assumed that the output of the analysis is sound; however, this is not always achieved, and discrepancies cast doubt on the results.

There are two types of clustering analysis: hierarchical clustering [4] and nonhierarchical clustering [5]. Hierarchical clustering is appropriate when there is distance/dissimilarity between the data points; it joins data based on similarities to a given point, and then combines those points based on their similarities. In this way, a multidimensional data set is reduced to a two-dimensional set, with the axes indicating labeling and clustering distance. Representatives of these methods include simple linkage, complete linkage, group averaging, weighted averaging, methods using the centroid or median, and Ward's method. If we define the dissimilarity of  $i, j$ , and  $k$  to be  $C_i, C_j$ , and  $C_k$ , respectively, then

$$d(C_i \cup C_j, C_k) = \alpha_i d(C_i, C_k) + \alpha_j d(C_j, C_k) + \beta d(C_i, C_j) + \gamma |d(C_i, C_k) - d(C_j, C_k)|,$$

where the values of  $\alpha_i, \alpha_j, \beta$ , and  $\gamma$  are given in Table 1.

1 **Table 1. Parameters of various hierarchical clustering methods.**  $\beta$ ,  $\square$ : corrections  
2 based on the triangle  $ijk$ ; Dissimilarity [ $E2$ : Euclidean distance;  $E2'$ : half of the  
3 squared Euclidean distance]; Monotony [monotonically increasing lengths (We note  
4 that this is not true in the centroid and median methods. The value of a monotonic  
5 increase depends on the particular situation.); T: true; F: false;]; Metric [expansion &  
6 reduction: renewal of ongoing clustering by increasing or reducing the distance between  
7 data points].

| method              | $\alpha_i$                          | $\alpha_j$                          | $\beta$                          | $\square$ | Dissimilarity     | Monotony | Metric                      |
|---------------------|-------------------------------------|-------------------------------------|----------------------------------|-----------|-------------------|----------|-----------------------------|
| single              | 1/2                                 | 1/2                                 | 0                                | -1/2      | no<br>restriction | T        | reduction                   |
| complete            | 1/2                                 | 1/2                                 | 0                                | 1/2       | no<br>restriction | T        | expansion                   |
| group<br>average    | $\frac{n_i}{n_i + n_j}$             | $\frac{n_j}{n_i + n_j}$             | 0                                | 0         | no<br>restriction | T        | conserved                   |
| weighted<br>average | 1/2                                 | 1/2                                 | 0                                | 0         | no<br>restriction | T        | conserved                   |
| centroid            | $\frac{n_i}{n_i + n_j}$             | $\frac{n_j}{n_i + n_j}$             | $\frac{-n_i n_j}{(n_i + n_j)^2}$ | 0         | $E2$              | F        | conserved<br>&<br>reduction |
| median              | 1/2                                 | 1/2                                 | -1/4                             | 0         | $E2$              | F        | conserved<br>&<br>reduction |
| Ward                | $\frac{n_i + n_k}{n_i + n_j + n_k}$ | $\frac{n_j + n_k}{n_i + n_j + n_k}$ | $\frac{-n_k}{n_i + n_j + n_k}$   | 0         | $E2'$             | T        | conserved<br>&<br>expansion |

8  
9 Nonhierarchical clustering, for example, the  $k$ -means method, is an  
10 optimization approach based on classification. The number of groups,  $k$ , is initialized.  
11 Dissimilarity is measured using the squared Euclidean distance. The  $k$  groups are then  
12 determined and scored as each data point is added. The grouping that gives the lowest  
13 score is chosen, and the process is repeated. The selection of the number of groups is a  
14 top-down approach, but from other aspects, this is a bottom-up approach. Each of the

1 eight methods, including seven hierarchical methods and the  $k$ -means method, can be  
2 relatively easily implemented on a computer, and these are more frequently used than  
3 are other, more complex methodologies.

4 A problem arises, however, when there is a high-dimensional data set (more  
5 than 1000 variables); this effect is referred to as the “curse of dimensionality”. In such a  
6 situation, the variances among samples become large and sparse, and a clustering  
7 analysis produces meaningless results (see, e.g., [6]). One solution is to use machine  
8 learning [7]. However, the high dimensionality produces a very large or incalculable  
9 value for the Akaike information criterion, and this means the solution may be invalid.  
10 Alternatively, principal component analysis (PCA) with maximized variances of  
11 variance-covariance matrix [8] or non-metric multi-dimensional scaling calculating  
12 similarity in reduced dimensions without the constraint of linearity (nMDS) [9] is  
13 utilized to classify the observed data sets. These methods also exhibited “curse of  
14 dimensionality” in very high dimension, however.

15 In this manuscript, we present a mathematical solution that uses rigid  
16 geometry to pretreat the data prior to a cluster analysis. The most important aspect of  
17 clustering is determining the metric, and we considered the  $p$ -adic metric (of a prime  
18 ideal), which is based on rigid geometry (Please refer S1 Appendix). Utilizing the idea  
19 of blowing up singularity in rigid geometry, one can resolve singularity that affects  
20 most parts of fluctuations and purify the internal characteristic residing in the dataset  
21 [10]. This allowed us to discriminate between control samples and those that had been  
22 held in long-term storage. An appropriate metric must satisfy (i) a separation axiom (not  
23 necessarily nonnegative), (ii) the identity of indiscernibles, (iii) symmetry, and (iv) the  
24 triangle inequality. Examples of metrics include the absolute distance, the Chebyshev  
25 distance, the Euclidean distance, the average Euclidean distance, squared Euclidean  
26 distance, the Minkowski distance, the correlation efficiency, cosine efficiency nearest  
27 neighbor distance and the radial basis kernels. The selection of the metric significantly  
28 affects the calculation (see, e.g., [6]). We picked up nearest neighbor distances

29  $ANN = \frac{\bar{D}_O}{\bar{D}_E}, \bar{D}_O = \frac{\sum_{i=1}^n d_i}{n}, \bar{D}_E = \frac{0.5}{\sqrt{n/A}}$  and radial basis kernels  $K(\mathbf{x}, \mathbf{z}) = \exp\left(-\gamma_K \|\mathbf{x} - \mathbf{z}\|^2\right)$  together with Euclidean distances and correlation distances  $d_{cor}(\mathbf{x}, \mathbf{z}) = 1 -$   
30  $r_{cor}(\mathbf{x}, \mathbf{z})$  [11] to compare the results with a  $p$ -adic metric we invented, when  $d_i$  is an  
31 element  $i$  of distance vector,  $A$  is a total study area,  $\mathbf{x}, \mathbf{z}$  are a vectors of interests and  $r_{cor}$   
32

1 is the correlation of them. You can easily see that all the nearest neighbor distances,  
 2 radial basis kernels and Euclidean distances preserve the high dimensionalities in the  
 3 distance vector  $\mathbf{d}$ . Correlation distances seems to cancel out high dimensionality with  
 4 quotient, but still does not erase the trace of singularities. This might be the cause of  
 5 “curse of dimensionality”. A principle of modern geometry is that there exists a  
 6 nilpotent state in which observed values converge and oscillate about  $-1$ ; this results in  
 7 a system that is easier to handle. Rigid geometry is a well-known mathematical field  
 8 and is based on the complete non-Archimedean field; it was introduced in 1962 by John  
 9 Tate [12–14]. It allows us to use  $p$ -adic elliptic curves to solve the singularity problem  
 10 [10]. In this system, the non-Archimedean valuation system enables values to converge  
 11 globally, but locally the values are free, due to the high dimensionality. There is a  
 12 mathematically well-known topology that meets this type of requirement, Grothendieck  
 13 topology ( $G$ -topology) [15]. Below, we will present the application of rigid geometry to  
 14 a biological data set, and we will show that this removes the effects of the “curse of  
 15 dimensionality”; the resulting topology of the clusters can then be easily interpreted.

16

## 17 **Results**

18 Direct analysis of unused LC/MS data resulted in nonproper clustering of  
 19 samples with clustering methods or non-metric multidimensional scaling

20 We extracted proteins from HEK-293 cells that had been stored in different freezing  
 21 conditions. As a control, we collected fresh samples from a cell culture, samples from  
 22 cells frozen for 1 h at  $-80^{\circ}\text{C}$  (1h), and samples from cells frozen overnight at  $-80^{\circ}\text{C}$   
 23 and subsequently transferred to liquid nitrogen and held overnight (o/n-o/n). For the  
 24 treated samples, we used samples that had been preserved in liquid nitrogen for 2 or 3  
 25 years. See the Methods section for more details. After performing LC/MS, we extracted  
 26 unused values (the amount of total, unique peptide evidence related to a given protein)  
 27 and performed clustering analyses using various hierarchical methods and the  $k$ -means  
 28 method. We found that although different treatments of the sample gave significantly  
 29 different results, clustering did not yield meaningful information; the clusters were not  
 30 reproducible, and the outputs differed with different methods; see Fig 1A. The control  
 31 and treatment data were combined and neural-network-based machine learning  
 32 produced clustering of  $\text{cl}$  values (the expected number of columns in the model of the  
 33 training data set) on both the control samples and the storage samples. The samples that

1 had been stored for 2 years were distinct from the control values, and only those stored  
 2 for 3 years were interspersed (Fig 1A). This suggests the presence of “curse of  
 3 dimensionality” effects (see, e.g., [6]). Additionally, PCA exhibited 89% of the data can  
 4 be explained by a single component (PC1) with absolute correlation values  $> 0.74$  in  
 5 each, indicating failure in clustering (Table 2). PC2 and PC3 occupies 6% and 1%  
 6 contributions, respectively. nMDS did not show proper clustering among control  
 7 samples and samples frozen for years, indicating failure (Fig 1A). The number of  
 8 unknown parameters in the neural network was 1636. This idea is illustrated in Fig 2A,  
 9 and actual structures in geometric space are important for conducting these calculations  
 10 [6]. In this first analysis, we used the simple unused values with Euclidean distances  
 11 when calculating the dissimilarity.

12

13 **Table 2. Correlation matrix of LC/MS data and principal components.**

| raw | f-1   | f-2  | f-3   | 1h1   | 1h2   | o/1   | o/2   | 2y1  | 2y2  | 2y3   | 3y    |
|-----|-------|------|-------|-------|-------|-------|-------|------|------|-------|-------|
| PC1 | 0.97  | 0.92 | 0.97  | 0.97  | 0.98  | 0.95  | 0.96  | 0.74 | 0.88 | 0.98  | 0.96  |
| PC2 | -0.11 | 0.28 | -0.10 | -0.12 | -0.12 | -0.08 | -0.20 | 0.64 | 0.40 | -0.00 | -0.12 |
| PC3 | -0.02 | 0.19 | -0.12 | -0.00 | -0.01 | 0.23  | -0.07 | 0.17 | 0.13 | -0.00 | -0.12 |

14

15 A  $p$ -adic metric based on rigid geometry eliminated “curse of  
 16 dimensionality” effects with LC/MS data

17 To avoid the pitfalls described above, we designed a better metric for the calculation of  
 18 groups (Please refer S1 Appendix). If we choose an appropriate geometric metric that is  
 19 nilpotent for convergence/divergence of values and converges to an oscillation around  
 20  $-1$ , then more over-converged output can be extracted and used to discriminate between  
 21 the observed characteristics. A common approach for this is to use rigid geometry.  
 22 When using a  $p$ -adic metric that includes a subring of norm  $< |1|$ , a non-Archimedean  
 23 field is more likely to converge than is an Archimedean real field or a complex field.  
 24 The geometry converges globally, but locally the values are free, enabling freedom  
 25 from the restriction due to “curse of dimensionality”.

26 One example of this type of analysis is illustrated in Fig 2B (see, e.g., [16]).  
 27 Consider characteristic points of an icosahedron projected onto a sphere: 12 vertices  
 28 (indicated in blue in Fig 2B), 20 barycenters (the 20 centers of the triangular faces; in

1 green), and 30 edge midpoints (in red). Projecting the icosahedron from its center to a  
 2 sphere maps a tessellation of the sphere into 120 triangles, as shown in Fig 2B left. The  
 3 angles are  $\pi/2$  for red,  $\pi/3$  for green, and  $\pi/5$  for blue. The generator  $I$  on Riemann  
 4 sphere is:

$$I = \left\langle \begin{pmatrix} \zeta & 0 \\ 0 & 1 \end{pmatrix}, \begin{pmatrix} \zeta + \zeta^{-1} & 1 \\ 1 & -(\zeta + \zeta^{-1}) \end{pmatrix} \right\rangle, \zeta = e^{2\pi\sqrt{-1}/5}$$

5 An icosahedron has 6 cyclic subgroups of order 5, 10 cyclic subgroups of order 3, and  
 6 15 cyclic subgroups of order 2. The quotient of this Riemann sphere by the group  $I$  is  
 7 shown in Fig 2B right. In the figure, 2 (red points), 3 (green points), and 5 (blue points)  
 8 correspond to the midpoints of the edges, the barycenters of the faces, and the vertices,  
 9 respectively. As a result of this mapping, the system is simplified.

10 We define a  $p$ -adic metric based on rigid geometry, as described in the  
 11 Methods section, and use this to pretreat the data before clustering or machine learning;  
 12 the results are shown in Fig 1B. The control samples and those stored for long term  
 13 formed distinct clusters with each of the proposed methods; this suggests this method  
 14 eliminates the “curse of dimensionality”. Additionally, PCA showed 98% of  
 15 contributions was attributed to PC1, PC2, PC3 and PC4. Considering absolute values of  
 16 correlations, PC1 is attributed to 3y; PC2 is 2y2, 2y3; PC3 is 2y1; PC4 is f-2 with  
 17 milder correlation to other control samples (Table 3). Proper clustering of  $p$ -adic values  
 18 is thus well achieved also in PCA. For nMDS, the effect of clustering was prominent.  
 19 All the control samples localized at almost an identical point, while samples with years  
 20 of freezing environment sparse along the plotting (Fig 1B). The means of the variances  
 21 in the original method and the rigid geometry method (95% confidence intervals:  $60 \pm$   
 22  $10$  and  $6000 \pm 8000$ , respectively) do not reflect the advantage of using the  $p$ -adic  
 23 metric. However, the data from the rigid method had 10 outliers in high ranks (see Fig  
 24 3A for the skewness); these were defined as being larger than the corresponding  
 25 Euclidean value of the same rank. When the ten samples with the largest variances were  
 26 excluded, the means of the variances obtained with the original method and the rigid  
 27 geometry method became  $44 \pm 5$  and  $14 \pm 3$ , respectively, with  $p = 5 \times 10^{-20}$  for the  
 28  $t$ -test; again, this suggests the “curse of dimensionality” has been removed. We note that  
 29 neural-network-based machine learning showed the same tendency as in the previous  
 30 section; the number of unknown parameters was 1630. All the data indicate successful  
 31 clustering with  $v$  metric.

**Table 3. Correlation matrix among  $\nu$  metric of LC/MS data and principal components.**

| $\nu$ | f-1   | f-2   | f-3   | 1h1   | 1h2   | o/1   | o/2   | 2y1   | 2y2   | 2y3   | 3y    |
|-------|-------|-------|-------|-------|-------|-------|-------|-------|-------|-------|-------|
| PC1   | 0.14  | -0.00 | 0.06  | 0.08  | 0.19  | -0.42 | 0.23  | 0.01  | 0.01  | 0.01  | -1.00 |
| PC2   | -0.05 | 0.01  | -0.04 | 0.20  | 0.01  | -0.09 | -0.82 | 0.05  | -1.00 | 0.98  | -0.00 |
| PC3   | 0.01  | 0.03  | 0.10  | 0.05  | 0.21  | 0.08  | 0.02  | -1.00 | 0.01  | 0.06  | -0.00 |
| PC4   | -0.27 | -1.00 | -0.08 | -0.14 | -0.19 | -0.11 | -0.12 | -0.03 | -0.01 | -0.02 | 0.00  |

Some other metrics failed to eliminate “curse of dimensionality” effects with LC/MS data

To further clarifying the outperformance of  $\nu$  metric, we tested nearest neighbor distances for the calculation of clustering in LC/MS. None of the seven hierarchical clustering methods or  $k = 5$  means has successful results in clustering (Fig 4). From the original values of nearest neighbor distances, control samples and samples undergone long-term preservations were not properly clustered, either (Fig 4). Since there is only single dimension for comparison, neural network and PCA were not performed. There are also zero distances for nMDS, and this method was not performed, either.

We also performed kernel principal component analysis with radial basis kernels in LC/MS. Even utilizing this method, control samples and samples undergone long-term preservations were not properly clustered (Fig 4). For other methods such as cluster analysis via nonparametric density estimation with radial basis kernels and kernel  $k$ -means, neither of them had successful clustering results (Fig 4, cluster analysis via nonparametric density estimation was converged to a single group). Neural network used in this study was already with radial basis kernels, and nMDS was not suitable for the analysis because kernel is metric based.

Next, we calculated correlation distances and performed all the seven hierarchical clustering methods,  $k = 5$  means, neural network, PCA and nMDS. We found that none of the method was able to achieve proper separation between long-term storage samples and frozen samples (Fig 5, Table 4). Table 4 for PCA shows PC1 and PC2 (89 and 7% contribution to the data, respectively) were the major components and



1 PC1 lacks f-2 and 2y2 contribution, while PC2 is attributed to these two, which does not  
2 make sense for the proper clustering.

3

4 **Table 4. Correlation matrix among correlation distances of LC/MS data and**  
5 **principal components.**

|     | f-1  | f-2   | f-3   | 1h1  | 1h2  | o/1  | o/2   | 2y1   | 2y2   | 2y3  | 3y    |
|-----|------|-------|-------|------|------|------|-------|-------|-------|------|-------|
| PC1 | 0.98 | -0.12 | 0.98  | 0.98 | 0.99 | 0.91 | 1.00  | -0.97 | -0.62 | 0.94 | 0.97  |
| PC2 | 0.11 | 0.96  | -0.02 | 0.11 | 0.10 | 0.23 | -0.03 | 0.17  | 0.76  | 0.26 | -0.03 |

6

7 A  $p$ -adic metric based on rigid geometry also eliminated “curse of  
8 dimensionality” effects on some microarray data

9 To further characterizing the metric in other omics data such as gene expression data of  
10 microarray, we utilized existing data set of heme regulatory network in yeast  
11 *Saccharomyces cerevisiae* from [17]. In the original signal intensity data set of the  
12 expression array, heme deficient samples and heme sufficient samples were  
13 differentially clusterized in single linkage analysis and  $k = 4$  means method, but failed  
14 in other six hierarchical clustering methods or neural network tested (Fig 6A). However,  
15 utilizing  $\nu$  metric, all the seven hierarchical clustering methods and  $k = 4$  means method  
16 exhibited differentially clusterized heme deficient samples and heme sufficient samples  
17 (Fig 6B). In this data set, neural network with rigid geometry still did not improve the  
18 result of clustering, however. Additionally, PCA of raw signal values exhibited 97% of  
19 the data can be explained by a single component with absolute correlation values  $> 0.96$   
20 in each, indicating failure in clustering (Table 5). Even in  $\nu$  metric, 54% contribution  
21 was from PC1 (0.99 correlated with s2), 23% was from PC2 (-0.93 correlated with s3),  
22 19% was from PC3 (0.96 correlated with s1), 2% was from PC4 (1.00 correlated with  
23 d3), 2% was from PC5 (1.00 correlated with d2), 0.1% was from PC6 (0.99 correlated  
24 with d1). This independency of the components shows that PCA has failed in clustering  
25 even in  $\nu$  metric (Table 6). For nMDS, original raw signal intensities showed weak  
26 clustering (Fig 6A). However, as in LC/MS data,  $\nu$  metric exhibited that all the  
27 heme-deficient samples localized at almost an identical point, while heme-sufficient  
28 samples sparse along the plotting (Fig 6B), suggesting nMDS worked very fine. The  
29 average of variances in original signals and  $\nu$  metric were  $80000 \pm 30000$  and  $400000 \pm$

500000, respectively (95% confidential). When we removed 39 outlier samples of  $\nu$  metric (Fig 3B), they became  $70000 \pm 30000$  and  $1400 \pm 600$  with  $p = 7 \times 10^{-6}$  for the  $t$ -test, as in the LC/MS data of HEK-293. The number of unknown parameters in neural-network-based machine learning were 18685 and 18683 for original signals and  $\nu$  metric, respectively, indicating too many number of dimensions caused failure of clustering in neural network.

**Table 5. Correlation matrix of microarray data in *Saccharomyces cerevisiae* and principal components.** d; replicas of heme-deficient samples. s; replicas of heme-sufficient samples.

| raw | d1   | d2   | d3   | s1    | s2    | s3    |
|-----|------|------|------|-------|-------|-------|
| PC1 | 0.96 | 0.99 | 0.98 | 0.99  | 0.99  | 0.99  |
| PC2 | 0.26 | 0.01 | 0.15 | -0.10 | -0.15 | -0.14 |

**Table 6. Correlation matrix among  $\nu$  metric of microarray data in *Saccharomyces cerevisiae* and principal components.** d; replicas of heme-deficient samples. s; replicas of heme-sufficient samples.

| $\nu$ | d1    | d2    | d3    | s1    | s2   | s3    |
|-------|-------|-------|-------|-------|------|-------|
| PC1   | -0.06 | -0.02 | -0.00 | 0.01  | 0.99 | 0.30  |
| PC2   | 0.02  | -0.01 | 0.01  | -0.27 | 0.13 | -0.93 |
| PC3   | 0.05  | -0.07 | -0.04 | 0.96  | 0.03 | -0.22 |
| PC4   | 0.06  | 0.03  | 1.00  | 0.01  | 0.00 | 0.00  |
| PC5   | 0.14  | 1.00  | -0.02 | 0.01  | 0.00 | -0.00 |
| PC6   | 0.99  | -0.01 | -0.00 | -0.00 | 0.00 | 0.00  |

We also analyzed gene expression data characterized by induction factor of expression array in the culture of *Escherichia coli* in low glucose environments from [18]. Utilizing the values calculated by  $2^{\text{induction factor}}$ , all the seven hierarchical clustering methods,  $k = 4$  means and neural network failed in proper clustering between the samples of short starvation and long starvation (Fig 7A). However, the clustering of  $\nu$  metric by all the 7 hierarchical methods and  $k = 4$  means has succeeded in proper arrangements of clustering (Fig 7B). For neural network, only replicate 2 of long

1 starvation (GSM106341) was misclustered, suggesting the improvement of clustering.  
2 The number of unknown parameters in neural-network-based machine learning were  
3 2233 and 2223 for  $2^{\text{induction factor}}$  and  $v$  metric, respectively. Additionally, PCA exhibited  
4 63% of the data can be explained by a single component with absolute correlation  
5 values  $> 0.71$  in each. 12% of the data can be explained by s1 with a correlation value  
6 0.54, 11% of the data can be explained by l2 with a correlation value 0.54, 7% of the  
7 data can be explained by s3 with a correlation value -0.49, and 6% of the data can be  
8 explained by s2 with a correlation value 0.46. This mild independency indicates failure  
9 in clustering (Table 7). For  $v$  metric, 50% of the data can be explained by a single  
10 component with absolute correlation values  $> 0.62$  in each. 18% of the data can be  
11 explained by s3 with a correlation value 0.71, 14% of the data can be explained by s1  
12 with a correlation value -0.74, 10% of the data can be explained by l2 with a correlation  
13 value 0.70, 7% of the data can be explained by l1 & l3 with a correlation values -0.54  
14 and -0.53. This mild independency indicates failure in clustering (Table 8). For nMDS,  
15 original values showed weak clustering (Fig 7A). However, as in LC/MS data,  $v$  metric  
16 exhibited that all the samples with long exposure to a low glucose environment  
17 localized at almost an identical point, while samples with short exposure sparse along  
18 the plotting (Fig 7B), suggesting nMDS worked very fine. The average of variances in  
19 original signals and  $v$  metric were  $0.30 \pm 0.08$  and  $0.088 \pm 0.006$  (95% confidential),  
20 respectively, with  $p = 4 \times 10^{-7}$  for the  $t$ -test (Fig 3C).

21

22 **Table 7. Correlation matrix of microarray data in *Escherichia coli* and principal**  
23 **components.** s; replicas with short-term starvation. l: replicas with long-term starvation.

| raw | s1    | s2    | s3    | l1    | l2   | l3    |
|-----|-------|-------|-------|-------|------|-------|
| PC1 | 0.71  | 0.86  | 0.76  | 0.83  | 0.76 | 0.84  |
| PC2 | 0.54  | -0.10 | 0.26  | -0.44 | 0.09 | -0.43 |
| PC3 | -0.40 | -0.12 | 0.27  | -0.16 | 0.54 | -0.14 |
| PC4 | 0.18  | -0.15 | -0.49 | 0.04  | 0.35 | 0.06  |
| PC5 | -0.07 | 0.46  | -0.19 | -0.19 | 0.05 | -0.20 |

24

1 **Table 8. Correlation matrix among  $\nu$  metric of microarray data in *Escherichia coli***  
2 **and principal components.** s; replicas with short-term starvation. l: replicas with  
3 long-term starvation.

| $\nu$ | s1    | s2    | s3    | l1    | l2   | l3    |
|-------|-------|-------|-------|-------|------|-------|
| PC1   | 0.62  | 0.81  | 0.69  | 0.72  | 0.68 | 0.73  |
| PC2   | -0.26 | -0.35 | 0.71  | -0.27 | 0.05 | -0.26 |
| PC3   | -0.74 | 0.28  | -0.04 | 0.24  | 0.15 | 0.26  |
| PC4   | 0.01  | -0.27 | -0.15 | 0.01  | 0.70 | 0.02  |
| PC5   | -0.01 | 0.28  | -0.02 | -0.54 | 0.16 | -0.53 |

4  
5 These two data sets indicate that the calculation of  $\nu$  metric is effective not  
6 only in proteomics data, but also in expression data such as raw expression profiles or  
7 induction factors, at least in clustering methods and nMDS.

## 8 9 **Discussion**

10 Utilizing  $p$ -adic rigid geometry, we succeeded in eliminating the “curse of  
11 dimensionality” effects from significantly diverged sample data, at least for the LC/MS  
12 data for HEK-293. If the total number of dimensions ( $n = \sum n_d$ ) exceeds the original  
13 number of model dimensions (in this case,  $n = 1630$ ), the values converged. We  
14 assumed the number of traces ( $\sum n_d - n$ ) became nilpotent [19]. Here, 800 (the first rank  
15 protein data were removed from  $N = 803) \times 11 = 8800 > 1630$ , and the observed  
16 convergence of  $\nu$  was expected beyond the underdetermined system. To support this  
17 idea, clusters f-1, f-2, and 2y2, which were misclustered in Fig 1A, were appropriately  
18 clustered when using the  $\nu$  metric (Fig 8); this was true for all the clustering methods  
19 and neural network considered, with  $800 \times 3 = 2400 > 1606$ . This allowed us to  
20 determine whether a given sample was from a nearly fresh culture or had been stored  
21 for a long time at low temperature. It is also notable that for PCA, 90, 10 and 0.4%  
22 contributions were from PC1, PC2 and PC3, and 2y2, f-2 and f-1 were correlated  
23 independently to PCs with 1.00, 1.00 and 0.97, respectively. PCA seems not to work  
24 well in high-dimensional data. For nMDS, only three points are not proper to observe  
25 clustering.

1           This success is entirely based on an algebraic, analytic, and topological  
2   geometric analysis based on rigid geometry. So far as we know, this is the first  
3   application of “rigid geometry” to a biological system. We note that this methodology  
4   can be applied to any type of data, providing the data approximately follows a neutral  
5   logarithmic Boltzmann-type distribution. The agreement of results from a supervised  
6   machine learning and from several unsupervised clustering analyses demonstrates the  
7   power of this methodology. In biology, a similar approach can be used to evaluate the  
8   proteins inside cells of microbes [20]. The possibility of applications to other research  
9   fields, such as chemistry, physics, astronomy, and earth science, is promising but  
10   depends on successfully introducing the concept of “fitness” to the particular  
11   application.

12           We expect physiological differences affect the patterning of protein/mRNA  
13   expression in the type of analysis presented here. However, if fluctuations within a set of  
14   replicates are prominent, the clustering may be improperly achieved. We measure the  
15   fluctuations by observing obvious differences among control and experimental samples.  
16   From Fig 1A/Fig 6A/Fig 7A, obviously all the hierarchical clustering analyses show  
17   contradictory results, while from Fig 1B/Fig 6B/Fig 7B, all the hierarchical clustering  
18   analyses show matched results, indicating significant improvement at least for  
19   hierarchical clustering. Control samples of fresh samples vs. very short time of freezing  
20   have statistically non-significant difference in average quantification ( $p = 0.40$  for  $t$ -test),  
21   while that vs. years of freezing do have statistically significant difference ( $p = 6.0 \times 10^{-8}$   
22   for  $t$ -test). We thus concluded that long-term storage in low temperature does have affect  
23   sample preservation, while short-term does not.

24           We tried to utilize neural network for an example of supervised approach,  
25   which is more powerful tool for classification. However, the approach was not as  
26   trustable as we had expected, according to incalculable Akaike information criterion.  
27   Furthermore, the data of Fig 6A and Fig 6B have suggested neural network is not  
28   trustable if the data have very high dimensions. We thus moved to more general approach  
29   of clustering that is trustable in any methods we have tested, and this is the aim of this  
30   work. Our approach seems to erase the traces of huge degree of freedom by erasing the  
31   singularities. Additionally, regression analysis still depends heavily on the number of  
32   independent variables. If the number of variables is still large, it is difficult to classify the  
33   data due to “curse of dimensionality”. The data of PCA and  $p$ -adic metric performed well

in LC/MS compared with failure of clustering in original unused vales. However, neither original values nor  $v$  metrics perform well in expression arrays. This might be that high dimensionality prevents reducing dimensions to certain small values in PCA. It is also notable that in nMDS, control samples clustered to almost a single point, while experimental samples were sparse along the plots, indicating clear distinction of the characteristics of the samples by nMDS.

In conclusion, we have succeeded in removing the “curse of dimensionality” from the observed differences among control and treatment (fresh and stored) samples of HEK-293 cells when evaluating LC/MS data, and other expression data of *Saccharomyces cerevisiae* and *Escherichia coli* treated by clustering methods and nMDS. The success was entirely based on the topological characteristics of the  $p$ -adic metric on rigid geometry. This approach has the potential to calculate the characteristic values of any system for which the data approximate a neutral logarithmic Boltzmann distribution.

## Materials and Methods

### Cell culture

A human HEK-293 cell line from an embryonic kidney was purchased from RIKEN (Japan). The original cultures were frozen on either March 18, 2013 (3-year storage) or March 5, 2014 (2-year storage), and they were used in experiments between February and June 2016. The strain was cultured in Modified Eagle’s Medium (MEM) + 10% fetal bovine serum (FBS) + 0.1 mM nonessential amino acid (NEAA) at 37°C with 5% CO<sub>2</sub>. Subculturing was performed in 0.25% trypsin, and prior to the experiment, the original cells from RIKEN were frozen following the standard protocol provided by RIKEN: in culture medium with 10% dimethyl sulfoxide (DMSO), they were cooled until reaching 4°C at −2°C/min, held at that temperature for 10 min, cooled until reaching −30°C at −1°C/min in order to freeze, held at that temperature for 10 min, cooled again until reaching −80°C at −5°C/min, and then held at that temperature overnight. The next day, they were transferred to storage in liquid nitrogen. Freezing conditions for the control samples are described in the Results section.

### Protein extraction, alkylation, and digestion

1 The HEK-293 proteins were extracted using the standard protocol for the RIPA buffer  
2 (NACALAI TESQUE, INC., Kyoto, Japan). Approximately  $10^6$  harvested cells were  
3 washed once in Krebs-Ringer-Buffer (KRB; 154 mM NaCl, 5.6 mM KCl, 5.5 mM  
4 glucose, 20.1 mM HEPES pH 7.4, 25 mM NaHCO<sub>3</sub>). They were resuspended in 30  $\mu$ l  
5 of RIPA buffer, passed in and out through 21G needles for destruction, and incubated on  
6 ice for 1 h. They were then centrifuged at 10,000 g for 10 min at 4°C, followed by  
7 collection of the supernatants; the proteins were quantified by using a Micro BCA  
8 Protein Assay Kit (Thermo Fisher Scientific, Waltham, U.S.A.), and further processing  
9 was performed using XL-Tryp Kit Direct Digestion (APRO SCIENCE, Naruto, Japan).  
10 The samples were solidified in acrylamide gel, washed twice in ultrapure water, washed  
11 three times in dehydration solution, and dried. The samples were then processed using  
12 an In-Gel R-CAM Kit (APRO SCIENCE, Naruto, Japan). The samples were reduced  
13 for 2 h at 37°C, alkylated for 30 min at room temperature, washed five times with  
14 ultrapure water, washed twice with destaining solution, and then dried. The resultant  
15 samples were trypsinized overnight at 35°C. The next day, the dissolved digested  
16 peptides were collected by ZipTipC18 (Merck Millipore, Corp., Billerica, U.S.A.). The  
17 tips were dampened with acetonitrile twice and equilibrated twice with 0.1%  
18 trifluoroacetic acid. The peptides were collected by ~20 cycles of aspiration and  
19 dispensing, washed twice with 0.1% trifluoroacetic acid, and eluted by 0.1%  
20 trifluoroacetic acid /50% acetonitrile with aspiration and dispensing five times  $\times$  three  
21 tips followed by vacuum drying. The finalized samples were stored at -20°C. Before  
22 performing LC/MS, they were resuspended in 0.1% formic acid, and the amounts were  
23 quantified by Pierce Quantitative Colorimetric Peptide Assay (Thermo Fisher Scientific,  
24 Waltham, U.S.A.). This protocol is published at  
25 <http://dx.doi.org/10.17504/protocols.io.h4qb8vw>.

## 27 LC/MS

28 LC/MS was performed by the Medical Research Support Center, Graduate School of  
29 Medicine, Kyoto University with a quadrupole-time-of-flight [Q-ToF] mass  
30 spectrometer TripleTOF 5600 (AB Sciex Pte., Ltd., Concord, Canada). We followed  
31 their standard protocols. The loading amount for each sample was 1  $\mu$ g. We extracted  
32 the quantitative data for the unused information for identified proteins by using  
33 ProteinPilot 4.5.0.0 software (AB Sciex Pte., Ltd., Concord, Canada).



1  
2 **Clustering analyses and machine learning of the pattern**  
3 For LC/MS, hierarchical clustering analyses were performed by the standard hclust  
4 function in R 3.2.3 (<https://cran.r-project.org>) with the package stats. The actual  
5 hierarchical methods used were: single linkage, complete linkage, group average,  
6 weighted average, centroid, median, and Ward's method. The *k*-means method was  
7 performed by the standard kmeans function in R 3.2.3 with the package stats. It was  
8 calculated based on all eleven/six samples. For machine learning, an 11-1-1 hierarchical  
9 neural-network analysis was performed in R 3.2.3 with the package nnet, and the cl  
10 (number of raw data points) factors were calculated as a characterization index for the  
11 pattern. For expression arrays, all the analyses were done the same as LC/MS except  
12 using R 3.3.2 and 6-1-1 hierarchical neural-network. Principal component analyses  
13 (PCA) and non-metric multi-dimensional scaling (nMDS) were also performed by  
14 precomp and isoMDS functions of R 3.3.2 with the packages stats and MASS,  
15 respectively. The metric used for nMDS was:  $\frac{\sqrt{\text{variance}}}{\sqrt{n(n-1)}}$ . Nearest neighbor distances  
16 were calculated by nndist function of R 3.3.2 with the package spatstat. Kernel principal  
17 component analysis was performed by kpca function of R 3.3.2 with the package  
18 kernlab, selecting rbfdot option. Cluster analysis via nonparametric density estimation  
19 was performed by pdfCluster function of R 3.3.2 with the package pdfCIsuter. Kernel  
20 *k*-means method was performed by kkmeans function of R 3.3.2 with the package  
21 kernlab. Correlation distances were calculated by corDist function of R 3.3.2 with the  
22 package MKmisc. With correlation distances, 10-1-1 neural network was used because  
23 one of the 11 values was zero. We only used the unused values or expression data that  
24 are observable in each of the eleven/six samples; this was done to avoid distortion of the  
25 calculation from identification failures within the LC/MS process or microarray  
26 experiments, since there were relatively few signal values ( $N = 803, 9335, 1109$  in each  
27 sample). The actual unused values or expression data used in the calculation are shown  
28 in S2 Table.

## 29 **Supporting Information**

### 30 **S1 Appendix. Utilizing a *p*-adic metric embedded in rigid geometry.**

31 Appendix indicating calculation of the new metric  $v$ .  
32



## **S2 Table. The table of raw values for the identified proteins and expression arrays.**

Sheet 1, unused values for LC/MS in HEK-293; Sheet 2, raw signal intensities for expression array in *Saccharomyces cerevisiae* [17]; Sheet 3, raw induction factor values of *Escherichia coli* in [18]. Please also see the legend of Fig 1A, 7 and 9.

## **Acknowledgments**

We thank Prof. Tatsuaki Tsuruyama and the Medical Research Support Center, Graduate School of Medicine, Kyoto University for performing LC/MS. Additional support was provided by the Center for Anatomical, Pathological, and Forensic Medical Research, Graduate School of Medicine, Kyoto University, Japan. We are grateful for this laboratory support.

## **Author Contributions**

Shun Adachi is the sole author of this article.

## **References**

1. Parducci LG, Fennema O. Rate and extent of enzymatic lipolysis at subfreezing temperatures. *Cryobiology*. 1978; 15:199-204.
2. Voituron Y, Servais S, Romestaing C, Douki T, Barré H. Oxidative DNA damage and antioxidant defenses in the European common lizard (*Lacerta vivipara*) in supercooled and frozen states. *Cryobiology*. 2006; 52:74-82.
3. Kiss AJ, Muir TJ, Lee RE Jr, Costanzo JP. Seasonal variation in the hepatoproteome of the dehydration and freeze-tolerant wood frog, *Rana sylvatica*. *Int. J. Mol. Sci*. 2011; 12:8406-8414.
4. Müllner D. Modern hierarchical, agglomerative clustering algorithms; 2011. Preprint. Available from arXiv:1109.2378v1 [stat.ML]. Cited 26 April 2017
5. Jain AK. Data clustering: 50 years beyond K-means. *Pattern Recogn. Lett*. 2010; 31:651-666.
6. Ronan T, Qi Z, Naegle KM. Avoiding common pitfalls when clustering biological data. *Sci. Signal*. 2016; 9 re6:1-12.

- 1 7. Yousefian R. A review of neural network based machine learning approaches for  
2 rotor angle stability control; 2017. Preprint. Available from arXiv:1701.01214v1  
3 [cs.SY]. Cited 26 April 2017
- 4 8. Jolliffe IT, Cadima J. Principal component analysis: a review and recent  
5 developments. *Phil. Trans. R. Soc. A* 2016; 374:20150202.
- 6 9. Hout MC, Papesh MH, Goldinger SD. Multidimensional scaling. *Wiley Interdiscip.*  
7 *Rev. Cogn. Sci.* 2013; 4:93-103.
- 8 10. Hartshorne R. Algebraic geometry. Berlin/Heidelberg: Springer-Verlag; 1977.
- 9 11. Tarca AL, Carey VJ, Chen X-W, Romero R, Drăghici S. Machine Learning and its  
10 applications to biology. *PLoS Comput. Biol.* 2007; 3:e116.
- 11 12. Tate J. Rigid analytic spaces. *Inventiones Mathematicae.* 1971 [1962]; 12:257-289.
- 12 13. Fujiwara K, Kato F. Rigid geometry and applications. *Adv. Stud. Pure Math.* 2006;  
13 45:327-386.
- 14 14. Kato F. Topological rings in rigid geometry. In: Cluckers R, Nicaise J, Sebag J,  
15 editors. *Motivic integration and its interactions with model theory and*  
16 *non-Archimedean geometry, Vol. I.* London Math. Soc. Lecture Note Ser., 383.  
17 Cambridge: Cambridge Univ. Press, 2011. pp. 103-144.
- 18 15. Giraud J. Analysis situs. *Séminaire N. Bourbaki* 1962-1964; exp. n° 256: 189-199.
- 19 16. Cornelissen G, Kato F. The  $p$ -adic icosahedron. *Notices Amer. Math. Soc.* 2005;  
20 52:720-727.
- 21 17. Kundaje A, Xin X, Lan C, Lianoglou S, Zhou M, Zhang L, Leslie C. A predictive  
22 model of the oxygen and heme regulatory network in yeast. *PLoS Comp. Biol.*  
23 2008; 4:e1000224.
- 24 18. Franchini AG, Egli T. Global gene expression in *Escherichia coli* K-12 during  
25 short-term and long-term adaptation to glucose-limited continuous culture  
26 conditions. *Microbiology* 2006; 152:2111-2127.
- 27 19. Weyl H. The classical groups: Their invariants and representations, second revised  
28 ed. Princeton: Princeton Univ. Press; 1953.
- 29 20. Adachi S. Discrimination of domination mode and chaotic mode in species; 2016.  
30 Preprint. Available from arXiv:1603.00959v5 [q-bio.PE]. Cited 25 December 2016.

## Captions to Figures

**Fig 1. Clustering of value sets for each protein in the LC/MS data of HEK-293 ( $N = 803$ ).** f-1, f-2, and f-3: freshly prepared samples in replicates 1, 2, and 3, respectively; 1h1 and 1h2: samples frozen at  $-80^{\circ}\text{C}$  for 1 h in replicates 1 and 2, respectively; o/1 and o/2: samples that remained at  $-80^{\circ}\text{C}$  overnight and then in liquid nitrogen overnight (“o/n-o/n”) in replicates 1 and 2, respectively; 2y1, 2y2, and 2y3: samples preserved in liquid nitrogen storage according to the RIKEN protocol for approximately 2 years in replicates 1, 2, and 3, respectively; 3y: sample preserved in liquid nitrogen storage according to the RIKEN protocol for approximately three years. The numbers in the  $k$ -means table are the indices of the classified groups. The numbers in the neural network table are the cl factors, which represents the one-dimensional characteristics of the systems. The differences in cl values show dissimilarity of the samples. Please also see the Methods section. (A) Unused values. (B)  $v$  values.

**Fig 2. “Curse of dimensionality” and a possible solution.** (A) “Curse of dimensionality” effects when there is a sparse geometric distribution of data points; see also Ronan *et al.* (2016). (B) Example of geometric conversion to a simpler system: quotient of icosahedral tessellation by  $I$  on a Riemann sphere. 2 (red points), 3 (green points), and 5 (blue points) correspond to the midpoints of the edges, the barycenters of the faces, and the vertices, respectively; see also Cornelissen and Kato (2005).

**Fig 3. Ranked variance distributions of original values and  $v$  values of omics data.** Euclidean; raw values.  $v$ ;  $p(I)$ -adic  $v$  values. Horizontal axis: the rank of values. Vertical axis: the variances. (A) Ranked variance distributions of unused values and  $v$  values of proteins used for calculations ( $N = 803$ ). (B) Ranked variance distributions of raw signal intensity values and  $v$  values of expression arrays for *Saccharomyces cerevisiae* used for calculations ( $N = 9335$ ). (C) Ranked variance distributions of  $2^{\text{induction factor}}$  values and  $v$  values of expression arrays for *Escherichia coli* used for calculations ( $N = 1109$ ).

**Fig 4. Clustering of nearest neighbor distance value sets and radial basis kernel value sets for each protein in the LC/MS data of HEK-293 ( $N = 803$ ).** f-1, f-2, and f-3: freshly prepared samples in replicates 1, 2, and 3, respectively; 1h1 and 1h2:

1 samples frozen at  $-80^{\circ}\text{C}$  for 1 h in replicates 1 and 2, respectively; o/1 and o/2: samples  
2 that remained at  $-80^{\circ}\text{C}$  overnight and then in liquid nitrogen overnight (“o/n-o/n”) in  
3 replicates 1 and 2, respectively; 2y1, 2y2, and 2y3: samples preserved in liquid nitrogen  
4 storage according to the RIKEN protocol for approximately 2 years in replicates 1, 2,  
5 and 3, respectively; 3y: sample preserved in liquid nitrogen storage according to the  
6 RIKEN protocol for approximately three years. The numbers in the  $k$ -means table are  
7 the indices of the classified groups. The numbers in the neural network table are the cl  
8 factors, which represents the one-dimensional characteristics of the systems. The  
9 differences in cl values show dissimilarity of the samples. Please also see the Methods  
10 section.

11

12 **Fig 5. Clustering of correlation distance value sets for each protein in the LC/MS**  
13 **data of HEK-293 ( $N = 803$ ).** Euclidean; raw values.  $v$ ;  $p(I)$ -adic  $v$  values. Horizontal  
14 axis: the rank of values. Vertical axis: the variances. (A) Ranked variance distributions  
15 of unused values and  $v$  values of proteins used for calculations ( $N = 803$ ). (B) Ranked  
16 variance distributions of raw signal intensity values and  $v$  values of expression arrays  
17 for *Saccharomyces cerevisiae* used for calculations ( $N = 9335$ ). (C) Ranked variance  
18 distributions of  $2^{\text{induction factor}}$  values and  $v$  values of expression arrays for *Escherichia*  
19 *coli* used for calculations ( $N = 1109$ ).

20

21 **Fig 6. Clustering in the expression array data of *Saccharomyces cerevisiae* ( $N =$**   
22 **9335).** d1, d2, and d3: heme-deficient samples in replicates 1 (GSM206793), 2  
23 (GSM206794), and 3 (GSM206795), respectively; s1, s2, and s3: heme-sufficient  
24 samples in replicates 1 (GSM206796), 2 (GSM206797), and 3 (GSM206798),  
25 respectively. The numbers in the  $k$ -means table are the indices of the classified groups.  
26 The numbers in the neural network table are the cl factors, which represents the  
27 one-dimensional characteristics of the systems. The differences in cl values show  
28 dissimilarity of the samples. Please also see [17] and the Methods section for more  
29 detail. (A) Raw signal intensities. (B)  $v$  values.

30

31 **Fig 7. Clustering in the expression array data of *Escherichia coli* ( $N = 1109$ ).** s1, s2,  
32 and s3: samples with short-term starvation for glucose in replicates 1 (GSM106337), 2  
33 (GSM106338), and 3 (GSM106339), respectively; l1, l2, and l3: samples with

1 long-term starvation for glucose in replicates 1 (GSM106340), 2 (GSM106341), and 3  
 2 (GSM106342), respectively. The numbers in the  $k$ -means table are the indices of the  
 3 classified groups. The numbers in the neural network table are the cl factors, which  
 4 represents the one-dimensional characteristics of the systems. The differences in cl  
 5 values show dissimilarity of the samples. Please also see [18] and the Methods section  
 6 for more detail. (A)  $2^{\text{induction factor}}$  values. (B)  $\nu$  values.

7  
 8 **Fig 8. Clustering of newly invented  $\nu$  value sets of each protein in LC/MS of**  
 9 **HEK-293 ( $N = 803$ ).** f-1 and f-2: freshly prepared samples in replicates 1 and 2,  
 10 respectively; 2y2: a sample preserved in liquid nitrogen storage according to the RIKEN  
 11 protocol for approximately two years in replicate 2. The numbers in the  $k$ -means table  
 12 are the indices of the classified groups. The numbers in the neural network table are the  
 13 cl factors, which represents the one-dimensional characteristics of the systems. The  
 14 differences in cl values show dissimilarity of the samples. Please also see the Methods  
 15 section.

16

A

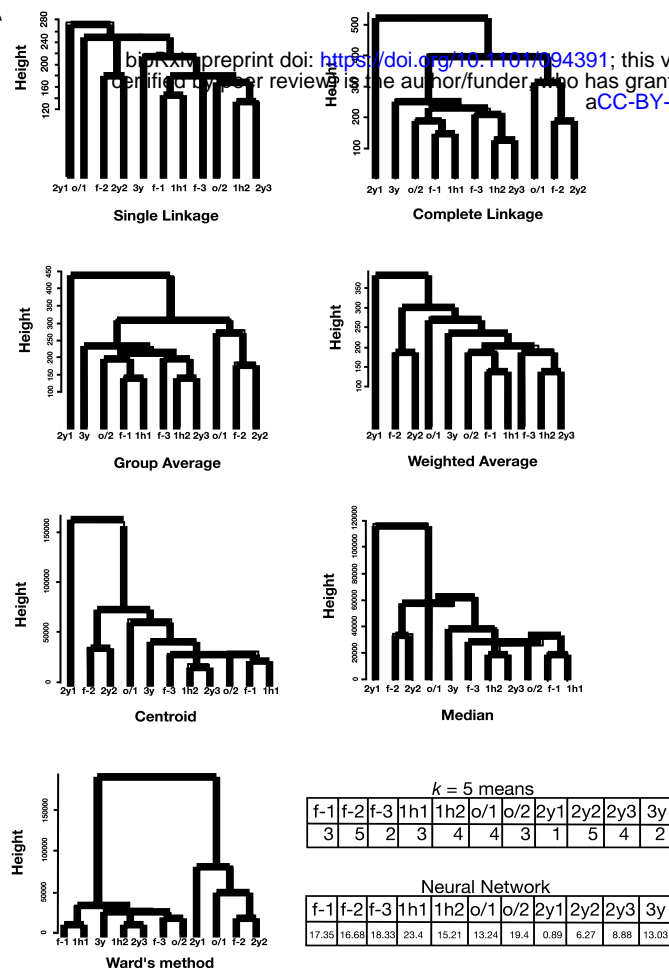

B

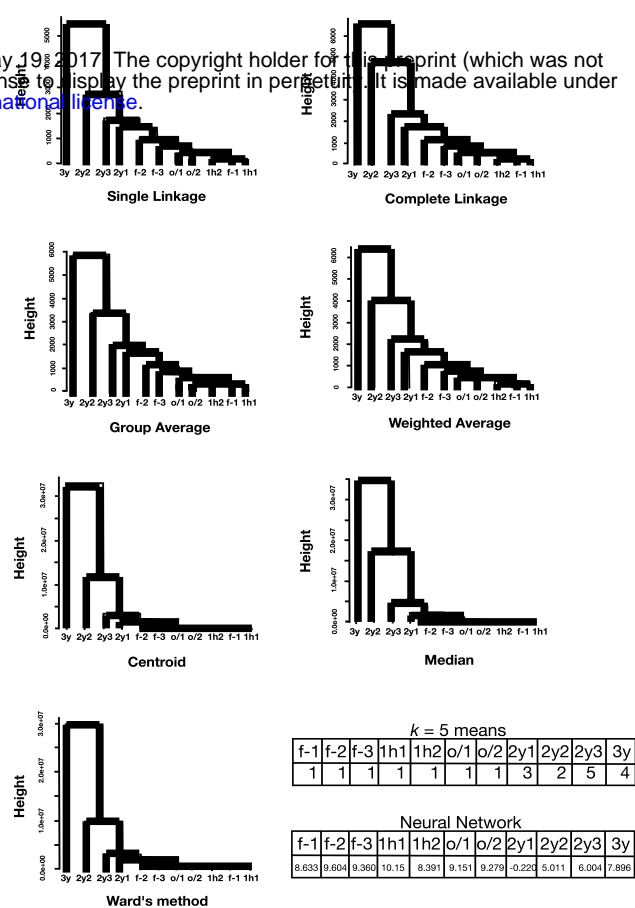

## Non-metric Multi-Dimensional Scaling

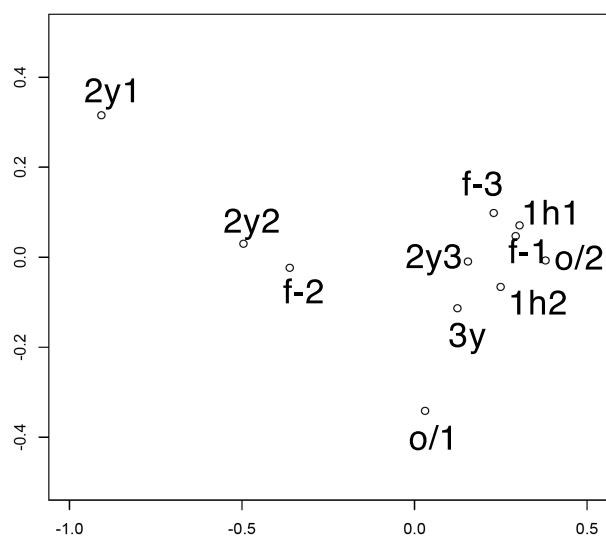

## Non-metric Multi-Dimensional Scaling

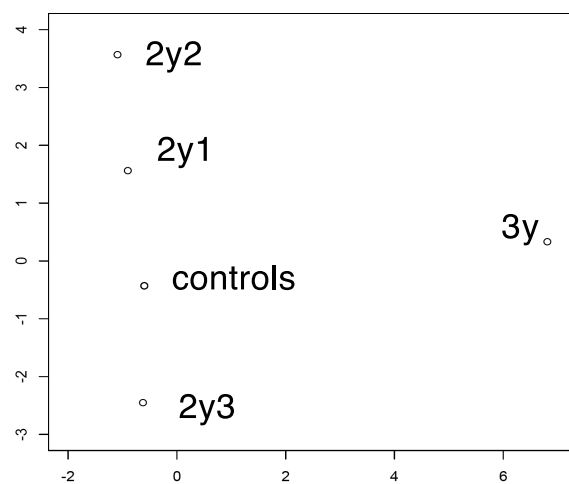

A

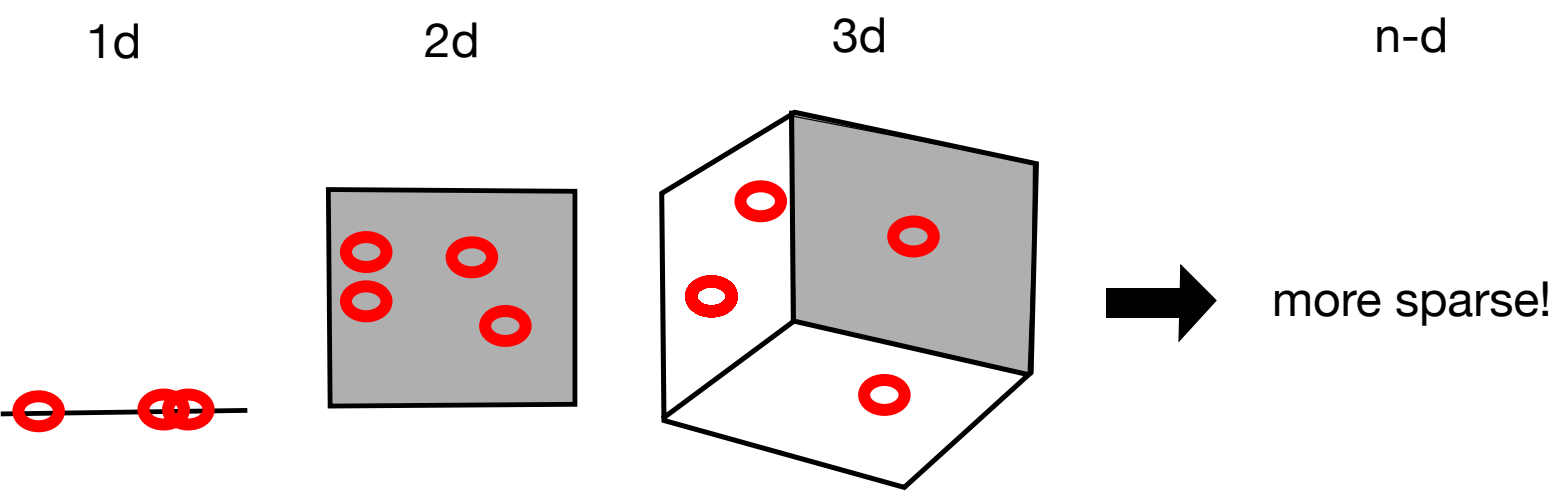

B

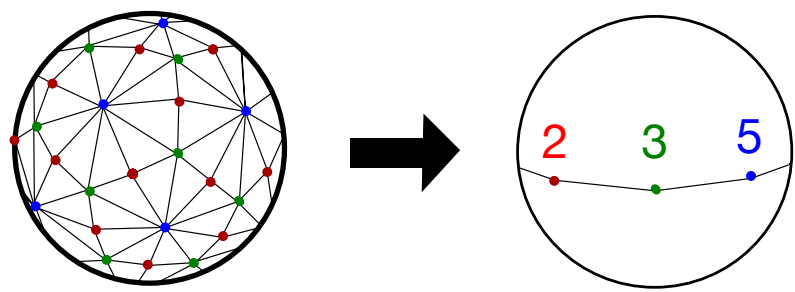

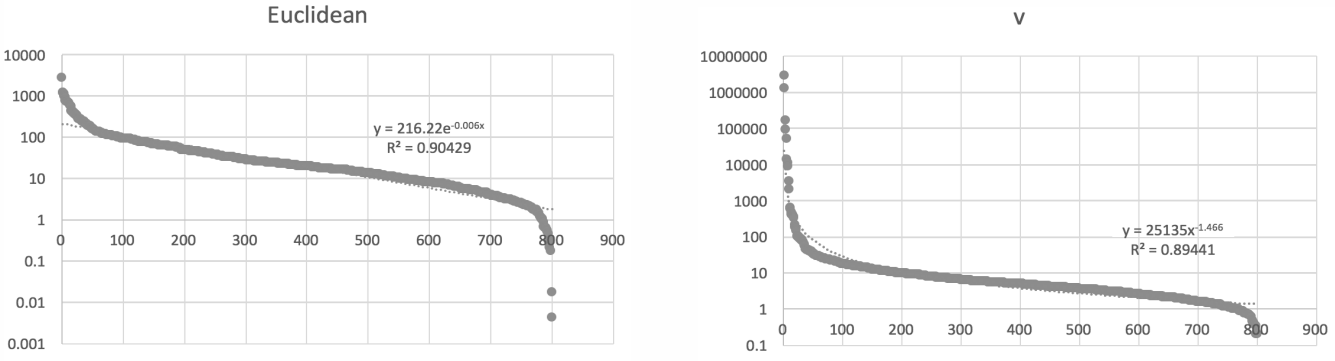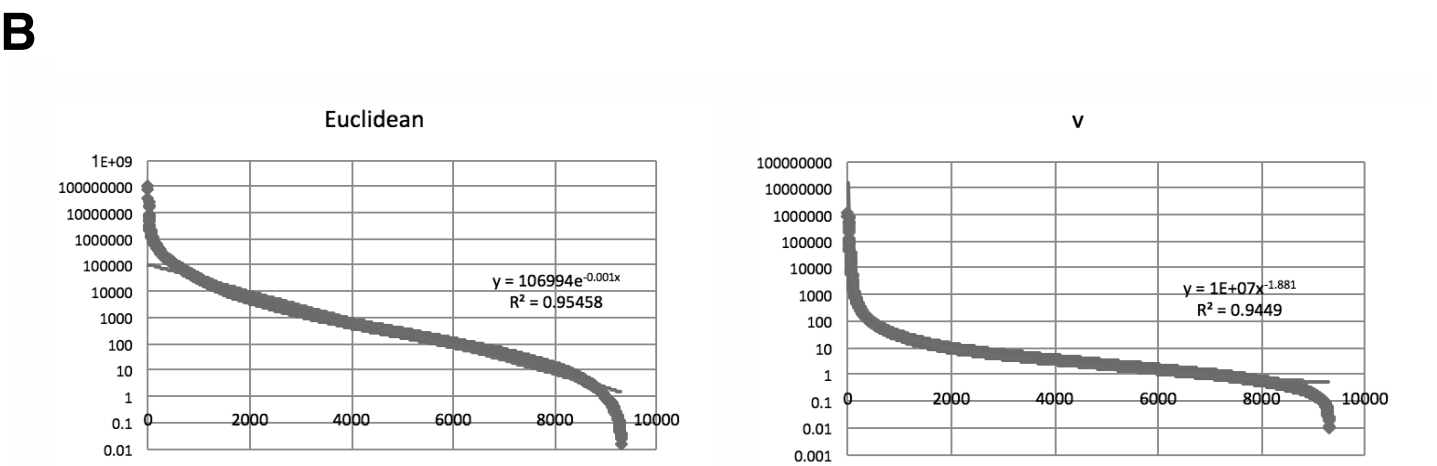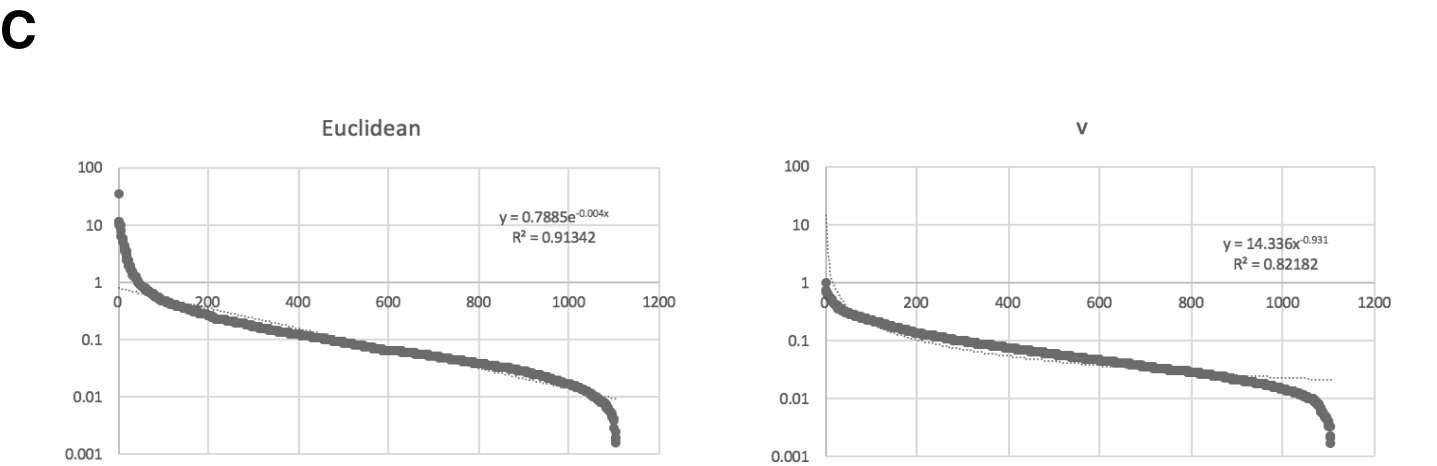



Nearest Neighbor Distances

k = 5 means

| f-1 | f-2 | f-3 | 1h1 | 1h2 | o/1 | o/2 | 2y1 | 2y2 | 2y3 | 3y |
|-----|-----|-----|-----|-----|-----|-----|-----|-----|-----|----|
| 3   | 1   | 4   | 3   | 3   | 1   | 4   | 2   | 5   | 3   | 5  |

Nearest Neighbor Distances (raw data)

| f-1   | f-2   | f-3   | 1h1   | 1h2   | o/1   | o/2   | 2y1   | 2y2   | 2y3   | 3y    |
|-------|-------|-------|-------|-------|-------|-------|-------|-------|-------|-------|
| 1.487 | 4.606 | 3.699 | 1.487 | 2.773 | 4.606 | 3.699 | 24.88 | 7.096 | 2.773 | 9.408 |

Kernel analyses

k = 5 kernel k means

| f-1 | f-2 | f-3 | 1h1 | 1h2 | o/1 | o/2 | 2y1 | 2y2 | 2y3 | 3y |
|-----|-----|-----|-----|-----|-----|-----|-----|-----|-----|----|
| 5   | 4   | 3   | 5   | 2   | 1   | 2   | 1   | 4   | 2   | 3  |

Kernel Principal Component Analysis

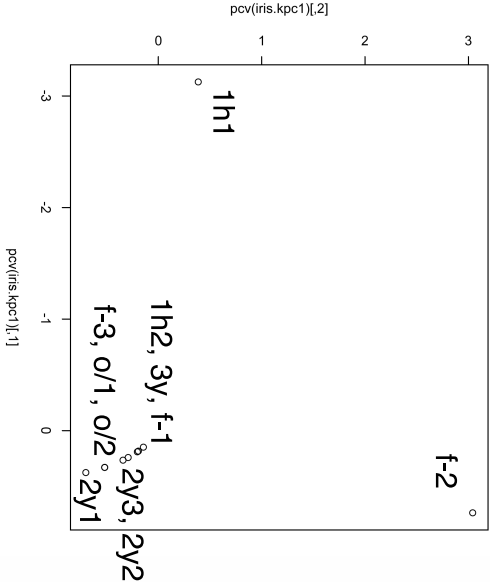

Single Linkage

Complete Linkage

Group Average

Weighted Average

Centroid

Median

Ward's method

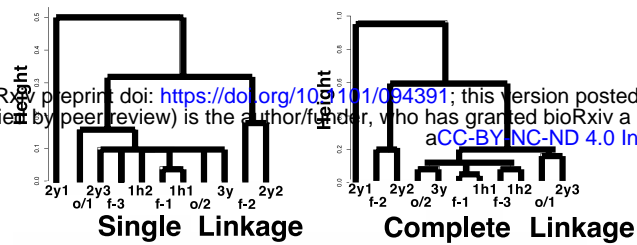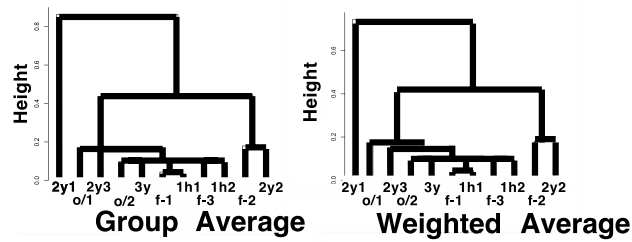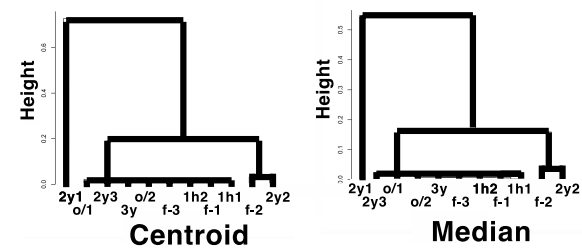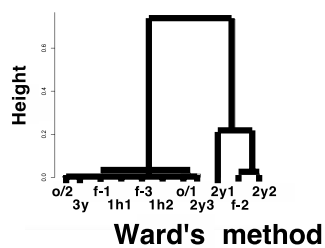

$k = 5$  means

| f-1 | f-2 | f-3 | 1h1 | 1h2 | o/1 | o/2 | 2y1 | 2y2 | 2y3 | 3y |
|-----|-----|-----|-----|-----|-----|-----|-----|-----|-----|----|
| 4   | 3   | 5   | 4   | 4   | 2   | 5   | 1   | 3   | 4   | 5  |

Neural Network

| f-1   | f-2   | f-3   | 1h1   | 1h2   | o/1   | o/2   | 2y1   | 2y2   | 2y3   | 3y |
|-------|-------|-------|-------|-------|-------|-------|-------|-------|-------|----|
| 0.059 | 0.168 | 0.067 | 0.075 | 0.057 | 0.110 | 0.050 | 0.363 | 0.215 | 0.067 | 0  |

## Non-metric Multi-Dimensional Scaling

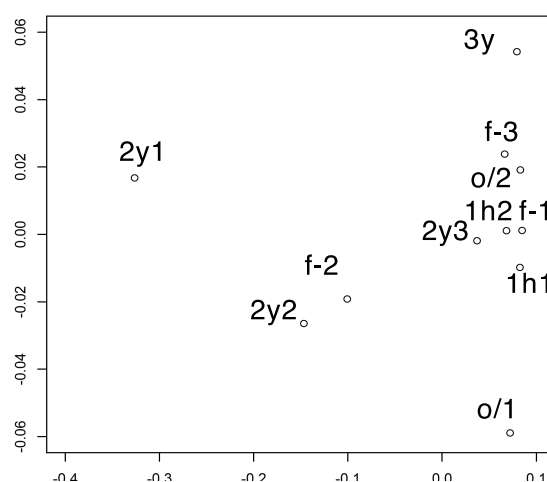

**A** Calculated from Kundaje et al. (2008)

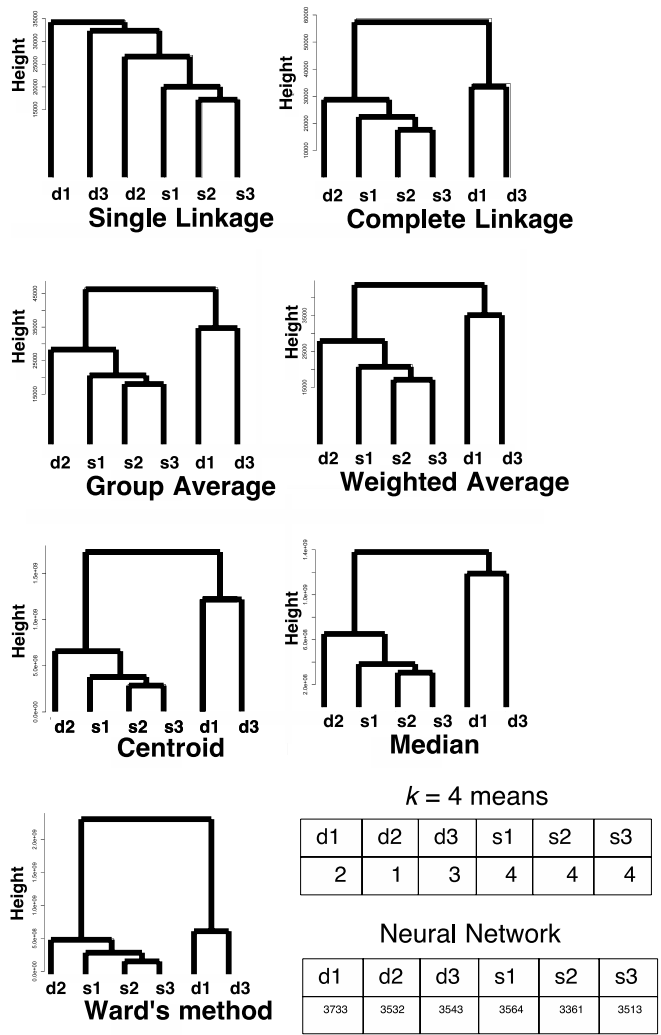

Non-metric Multi-Dimensional Scaling

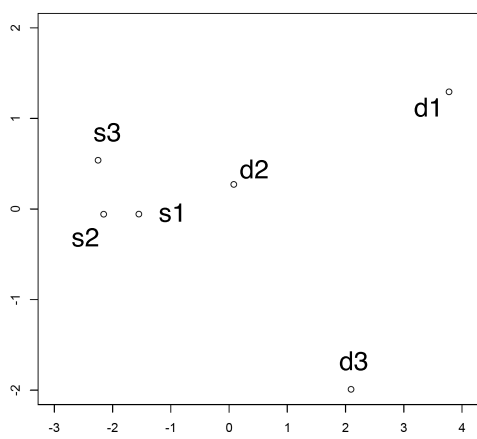

**B** Calculated from Kundaje et al. (2008)

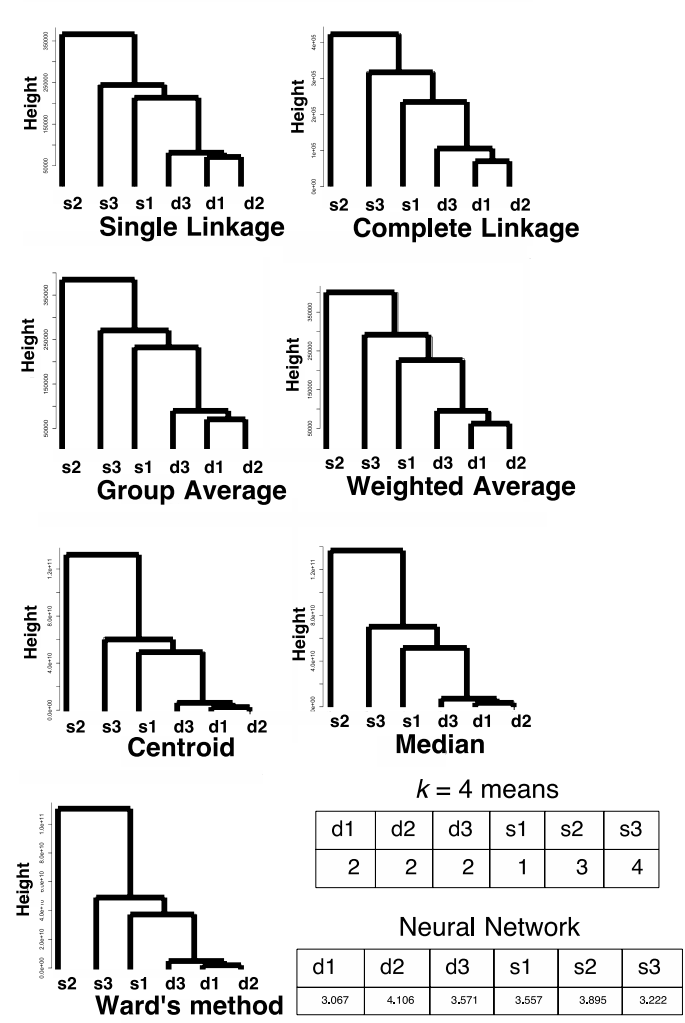

Non-metric Multi-Dimensional Scaling

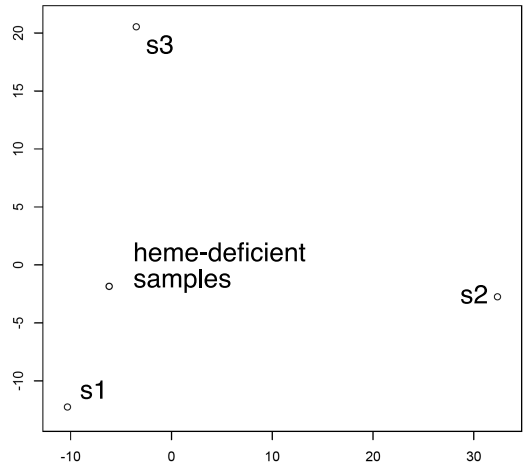

A

Calculated from Franchini and Egli (2006)

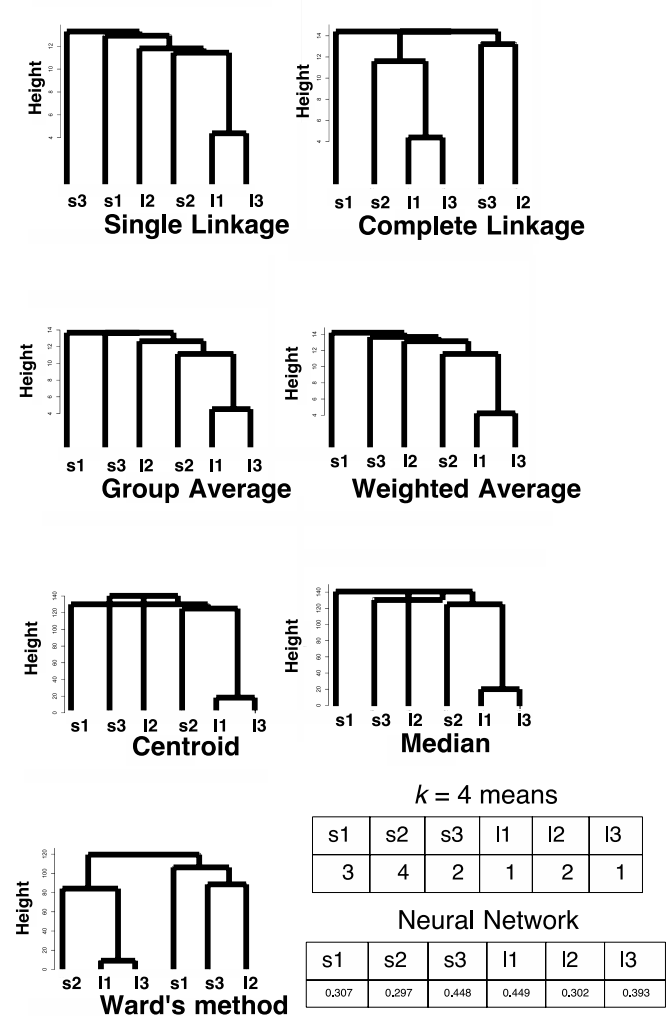

B

Calculated from Franchini and Egli (2006)

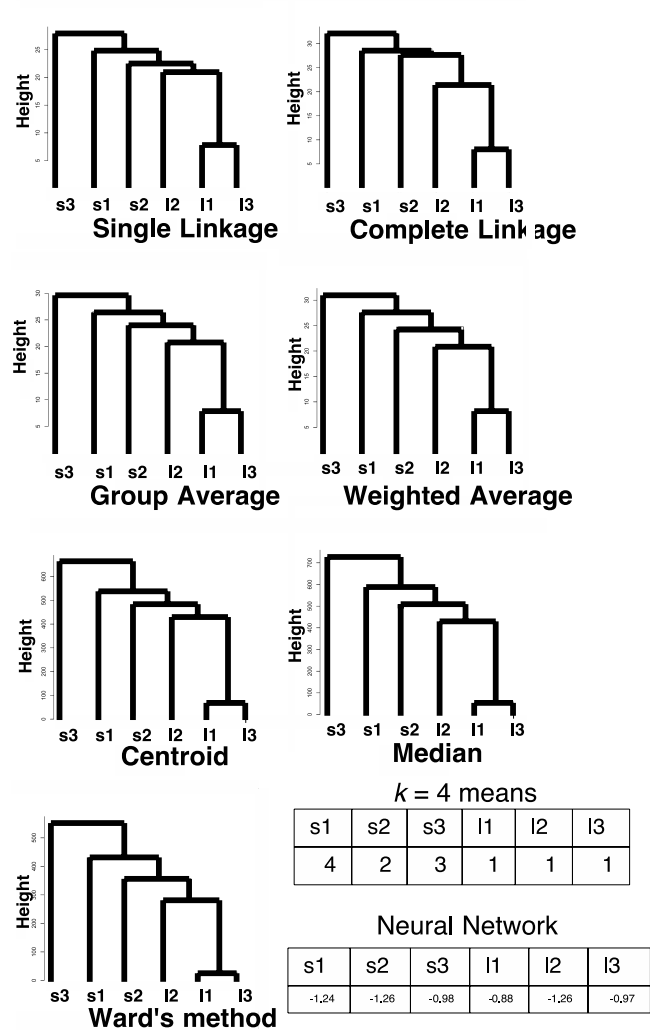

Non-metric Multi-Dimensional Scaling

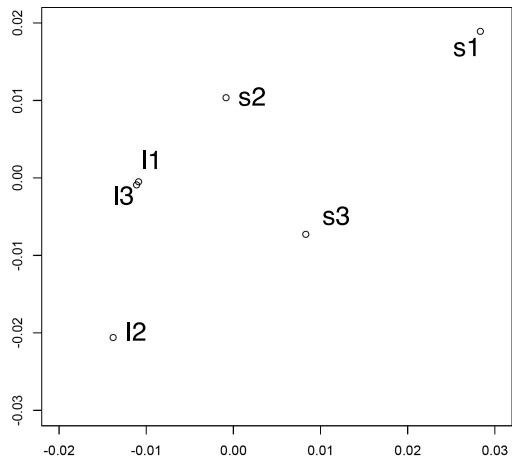

Non-metric Multi-Dimensional Scaling

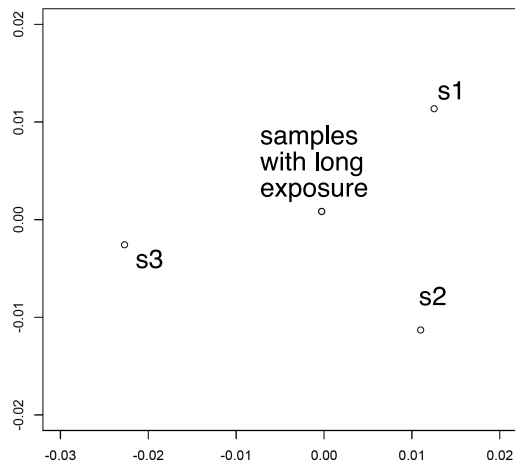

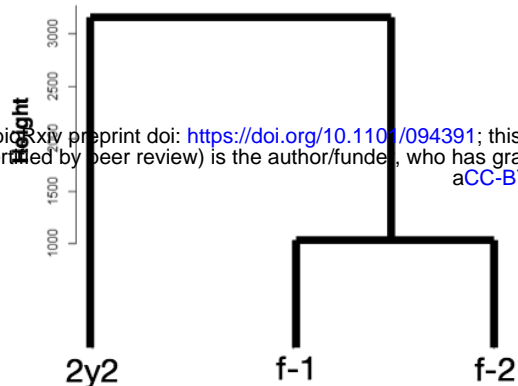

**Single Linkage**

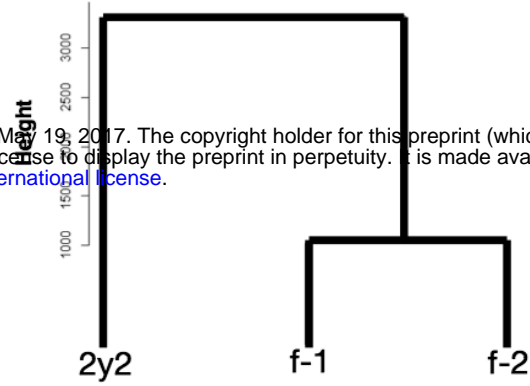

**Complete Linkage**

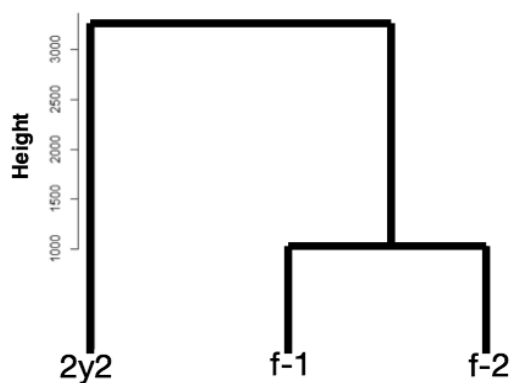

**Group Average**

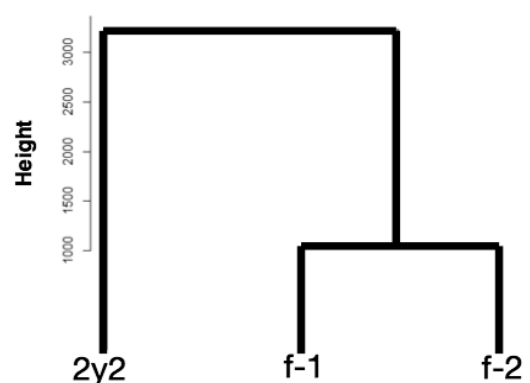

**Weighted Average**

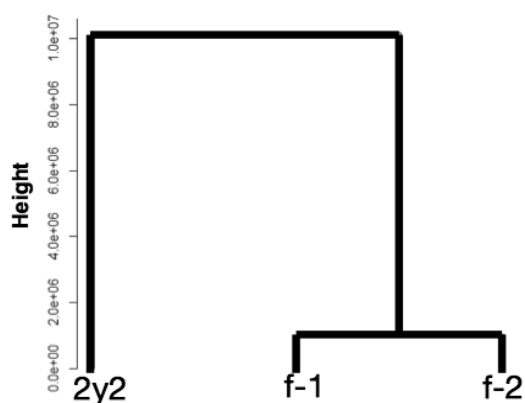

**Centroid**

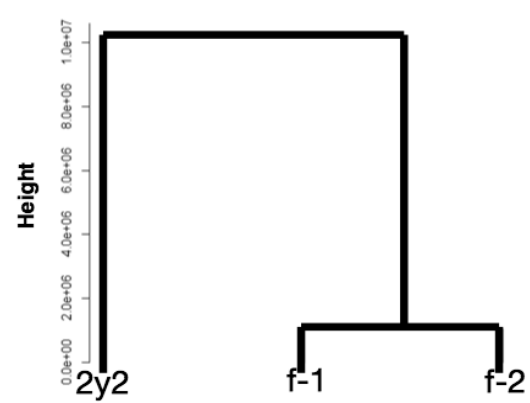

**Median**

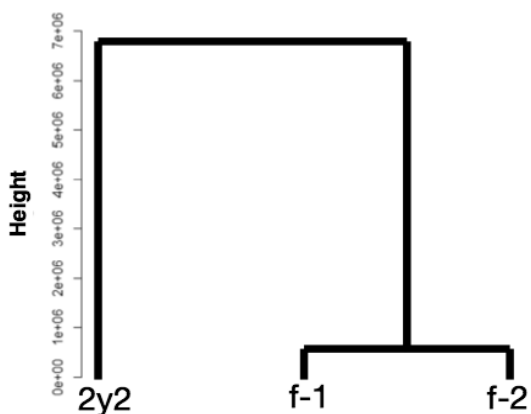

**Ward's method**

$k = 2$  means

| f-1 | f-2 | 2y2 |
|-----|-----|-----|
| 1   | 1   | 2   |

Neural Network

| f-1   | f-2   | 2y2   |
|-------|-------|-------|
| 8.633 | 9.604 | 5.011 |
